# Supplementary material for: Thermoplastic microfluidic devices for targeted chemical and biological applications
Source: Royal Society of Chemistry journal article supplement (doi:10.1039/c6ra27592c), 2017-01-01
Supplement: c6ra27592c1.pdf [file c6ra27592c1.pdf]

## Supporting Information

### Thermoplastic Microfluidic Devices for Targeted Chemical and Biological Applications

Dan Voicu,<sup>a</sup> Yihe Wang,<sup>a</sup> Michael Debono,<sup>a</sup> Gabriella Lestari,<sup>b</sup> Minseok Seo,<sup>a</sup> Sangho Cho,<sup>a</sup> and Eugenia Kumacheva,<sup>a,c</sup>

#### S1. Calculation of volume of gas plugs in PVC and PDMS reactors

To measure the extent of nitrogen gas perfusion through the ceiling of the PVC and PDMS T-junction MF devices, we generated segmented flow of alternating water slugs and N<sub>2</sub> gaseous plugs, similar to our earlier work.<sup>1</sup> The flow was stopped and a plug, at least, 15 cm downstream of the T-junction became stationary. The length of the plug,  $L_p$ , was measured during the 5 hr time interval. To calculate the initial volume of the plug,  $V_0$ , immediately after flow was stopped, we used the equation<sup>2</sup>

$$V_0 = H \cdot w(L_p - (H - 2d_f)) + \pi \cdot \left( w \cdot \left( \frac{H}{2} - d_f \right)^2 \right) \quad (1),$$

where  $V_0$  is the plug volume at  $t = 0$ ,  $H$  and  $w$  are the height and width of the microchannel, respectively ( $H = 150 \mu\text{m}$ ,  $w = 300 \mu\text{m}$ ), and  $d_f$  is the thickness of the liquid film surrounding the plug ( $d_f = 1.5 \mu\text{m}$ )<sup>2</sup>. We plotted the normalized volume,  $V_t/V_0$ , vs. time (Figure 2 in the main text of the manuscript) to compare the rate of nitrogen gas migration across the ceiling of the MF device fabricated in PDMS and PVC.

## References

1. D. Voicu, M. Abolhasani, R. Choueiri, G. Lestari, C. Seiler, G. Menard, J. Greener, A. Guenther, D. W. Stephan, and E. Kumacheva, *J. Am. Chem. Soc.* 2014, **136**, 3875.
2. M. Abolhasani, M. Singh, E. Kumacheva, and A. Guenther, *Lab Chip*, 2012, **12**, 1611.
